# Supplementary material
Source: PubMed Central journal article supplement (PMC5828159)
Supplement: NIHMS942771-supplement-supplement_1.pdf [file NIHMS942771-supplement-supplement_1.pdf]

**Supplementary Table 1.** Cross-sectional association of CSF biomarkers with clinical diagnosis excluding APOE as a covariate.

|                                 | Adjusted for<br>T-tau /A $\beta$ <sub>42</sub> | MCI                               |          | AD                                |          |
|---------------------------------|------------------------------------------------|-----------------------------------|----------|-----------------------------------|----------|
|                                 |                                                | Coefficients                      | p-values | Coefficients                      | p-values |
| $\alpha$ -syn                   | No                                             | 0.050<br>[(-0.008)-<br>(0.11)]    | 0.090    | 0.058<br>[(-0.009)-<br>(0.12)]    | 0.089    |
|                                 | Yes                                            | -0.046<br>[(-0.0)-(0.)]           | 0.086    | -0.064<br>[(-0.13)-(-<br>0.003)]  | 0.041    |
| pS129- $\alpha$ -syn            | No                                             | -0.002<br>[(-0.005)-<br>(0.0002)] | 0.074    | -0.0003<br>[(-0.003)-<br>(0.002)] | 0.84     |
|                                 | Yes                                            | -0.0007<br>[(-0.003)-<br>(0.002)] | 0.58     | 0.002<br>[(-0.001)-<br>(0.005)]   | 0.25     |
| $\alpha$ -syn -Tau-<br>Mismatch | Yes                                            | -0.20<br>[(-0.54)-<br>(0.14)]     | 0.17     | -0.33<br>[(-0.73)-<br>(0.070)]    | 0.20     |

Linear regression model is adjusted for age at baseline, and gender. Models with and without T-tau /A $\beta$ <sub>1-42</sub> ratio are listed as indicated in the second column.

**Supplementary Table 2.** Cross-sectional association of CSF pS129- $\alpha$ -syn values with clinical diagnosis in subjects with HgB<200 ng/ml.

|                      | Adjusted for<br>T-tau /A $\beta$ <sub>42</sub> | MCI                                |          | AD                                |          |
|----------------------|------------------------------------------------|------------------------------------|----------|-----------------------------------|----------|
|                      |                                                | Coefficients                       | p-values | Coefficients                      | p-values |
| pS129- $\alpha$ -syn | No                                             | -0.0026<br>[(-0.005)-<br>(0.0002)] | 0.0495   | -0.0007<br>[(-0.004)-<br>(0.001)] | 0.65     |
|                      | Yes                                            | 0.0011<br>[(-0.004)-<br>(0.002)]   | 0.41     | 0.0014<br>[(-0.002)-<br>(0.004)]  | 0.39     |

Linear regression model is adjusted for age at baseline, gender, and APOE  $\epsilon$ 4 presence. Models with and without T-tau /A $\beta$ <sub>1-42</sub> ratio are listed as indicated in the second column.

**Supplementary Table 3.** Association of baseline CSF pS129- $\alpha$ -syn values with longitudinal clinical changes in subjects with HgB<200 ng/ml. Reported as multivariate regression coefficient [95% confidence interval of coefficient] (p-value).

|                      | <b>Adjusted for<br/>T-tau /A<math>\beta</math><sub>1-42</sub>*time</b> | <b>ADAS-<br/>Cog13</b>                 | <b>Memory<br/>composite</b>             | <b>Executive<br/>function<br/>composite</b> | <b>MCI<br/>progression to<br/>AD</b>                    |
|----------------------|------------------------------------------------------------------------|----------------------------------------|-----------------------------------------|---------------------------------------------|---------------------------------------------------------|
| pS129- $\alpha$ -syn | No                                                                     | 0.54<br>[(-2.62)-<br>(3.71)]<br>(0.74) | -0.55<br>[(-2.48)-<br>(1.39)]<br>(0.58) | -2.19<br>[(-4.96)-<br>(0.58)]<br>(0.12)     | 0.13<br>[(0.00)-<br>(2.14*10 <sup>6</sup> )]<br>(0.81)  |
|                      | Yes                                                                    | 1.70<br>[(-1.35)-<br>(4.74)]<br>(0.28) | -1.32<br>[(-3.13)-<br>(0.49)]<br>(0.15) | -3.43<br>[(-6.0)-(-<br>0.85)]<br>(0.0093)   | 676.44<br>[(0.00)-<br>(41*10 <sup>10</sup> )]<br>(0.48) |

Model is adjusted for age at baseline, gender, education, and APOE 4 presence. Models with and without T-tau/A $\beta$ <sub>1-42</sub> ratios are listed as indicated in the second column.

**Supplementary Table 4.** Association of baseline CSF biomarker values with longitudinal clinical changes excluding APOE as a covariate. Reported as multivariate regression coefficient [95% confidence interval of coefficient] (p-value).

|                                         | Adjusted for<br>T-tau /A $\beta$ <sub>1-42</sub> *time | ADAS-<br>Cog13                            | Memory<br>composite                     | Executive<br>function<br>composite      | MCI<br>progression to<br>AD                                  |
|-----------------------------------------|--------------------------------------------------------|-------------------------------------------|-----------------------------------------|-----------------------------------------|--------------------------------------------------------------|
| $\alpha$ -syn                           | No                                                     | -0.12<br>[(-0.46)-<br>(0.21)]<br>(0.47)   | 0.087<br>[(-0.12)-<br>(0.29)]<br>(0.41) | 0.17<br>[(-0.13)-<br>(0.47)]<br>(0.27)  | 0.70<br>[(0.11)-(4.29)]<br>(0.70)                            |
|                                         | Yes                                                    | -0.59<br>[(-0.96)-(-<br>0.23)]<br>(0.002) | 0.37<br>[(0.16)-<br>(0.59)]<br>(0.0008) | 0.62<br>[(0.31)-<br>(0.93)]<br>(0.0001) | 0.02<br>[(0.002)-(0.21)]<br>(0.001)                          |
| pS129- $\alpha$ -syn                    | No                                                     | 0.39<br>[(-2.11)-<br>(2.89)]<br>(0.76)    | -0.17<br>[(-1.81)-<br>(1.46)]<br>(0.83) | -1.69<br>[(-3.72)-<br>(0.33)]<br>(0.10) | 0.28<br>[(7*10 <sup>-7</sup> )-(10 <sup>5</sup> )]<br>(0.85) |
|                                         | Yes                                                    | 1.45<br>[(-0.88)-<br>(3.80)]<br>(0.22)    | -0.93<br>[(-2.44)-<br>(0.58)]<br>(0.23) | -2.59<br>[(-4.5)-(-.70)]<br>(0.007)     | 96<br>[(1*10 <sup>-4</sup> )-(6*10 <sup>7</sup> )]<br>(0.50) |
| $\alpha$ -syn-p-tau <sub>181</sub> -Mis | Yes                                                    | -0.06<br>[(-0.11)-(-<br>0.02)]<br>(0.003) | 0.043<br>[(0.02)-<br>(0.07)]<br>(0.001) | 0.07<br>[(0.03)-<br>(0.10)]<br>(0.0006) | 0.66<br>[(0.51)-(0.85)]<br>(0.001)                           |

Model is adjusted for age at baseline, gender, and education. Models with and without T-tau/A $\beta$ <sub>1-42</sub> ratio are listed as indicated in the second column.
